# Supplementary material for: Serum interleukin-6 and C-reactive protein are associated with survival in melanoma patients receiving immune checkpoint inhibition
Source: PubMed Central journal article supplement — J Immunother Cancer. 2020 Jun 23;8(1):e000842. doi: 10.1136/jitc-2020-000842 (PMC7312339; doi:10.1136/jitc-2020-000842), 2020-06-23
Supplement: jitc-2020-000842supp001.pdf [file jitc-2020-000842supp001.pdf]

1 **Supplemental Figure 1.**

2

3

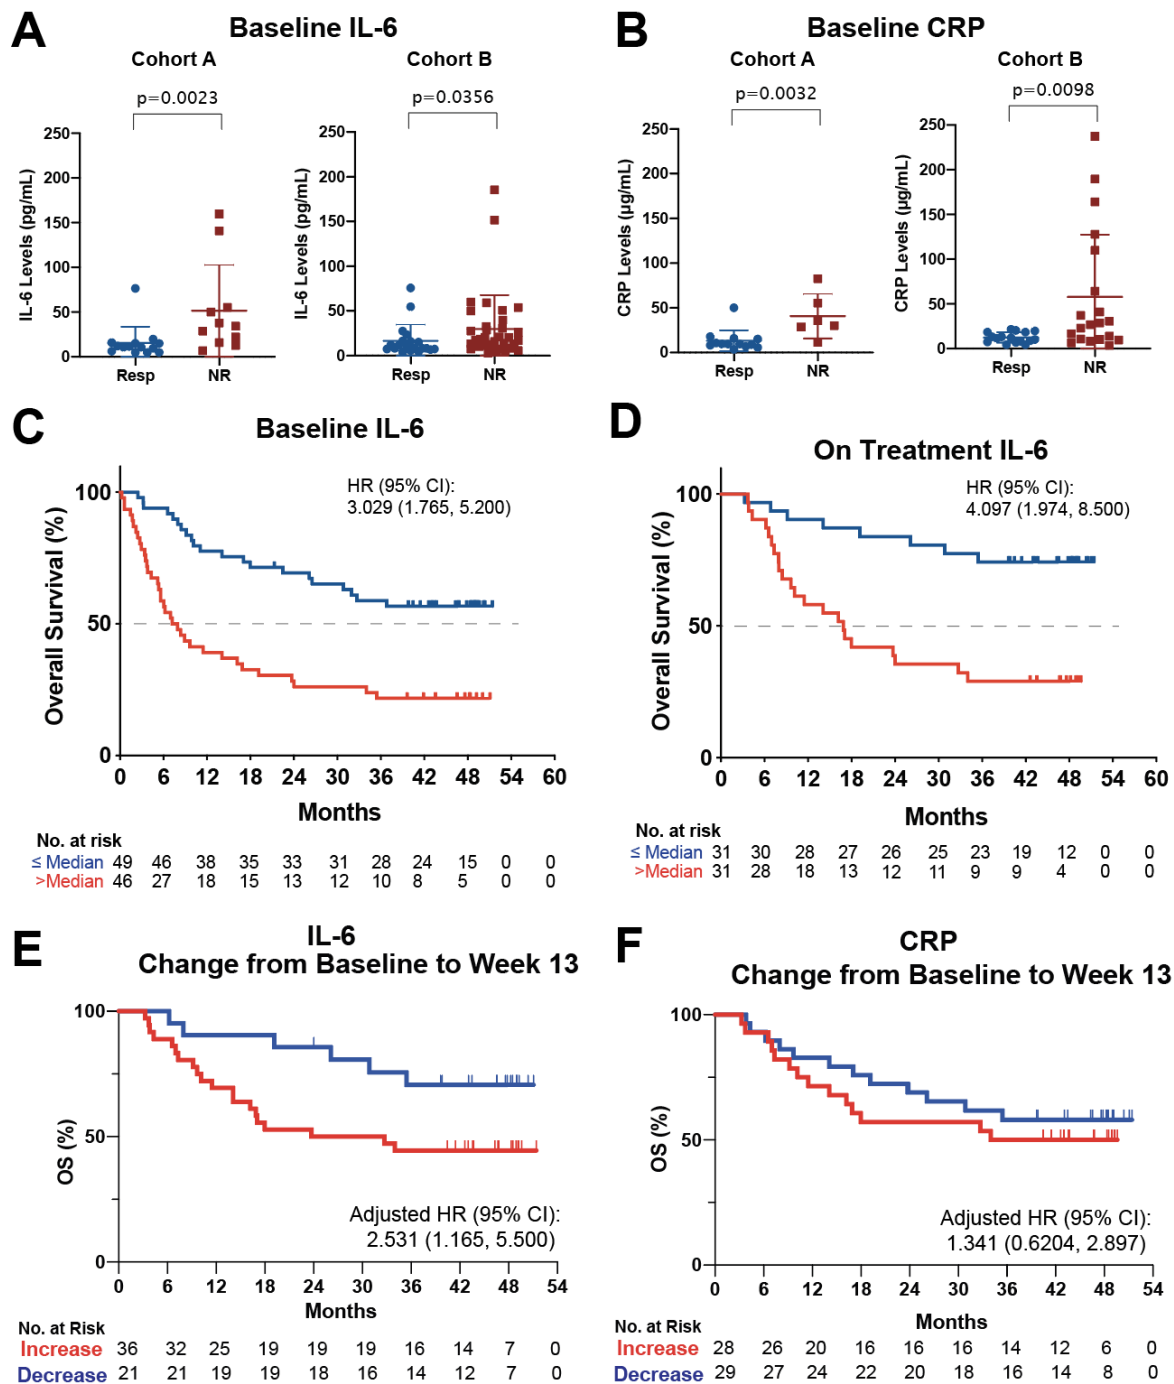

4

5

6

1 **Supplemental Figure 1. Serum IL-6 levels are associated with Checkmate-064 patient**  
2 **response and survival. (A)** IL-6 levels were compared in responders and non-responders  
3 (NR). Responders were defined as complete or partial response, non-responders had  
4 progression of disease. **(B)** CRP was likewise compared. **(C,D)** Survival curves were  
5 determined based on **(C)** baseline or **(D)** week 13 serum IL-6 levels divided at the median.  
6 Patients with less than or equal to the median value are represented in blue and those with  
7 greater than median values in red. **(E)** Survival curves were determined based IL-6 serum level  
8 changes from baseline to week 13. Patients with increases in IL-6 are shown in red and those  
9 with decreases in blue. **(F)** Survival curves were likewise determined for changes in CRP  
10 levels. For all survival curves, Cohort A and Cohort B were combined.

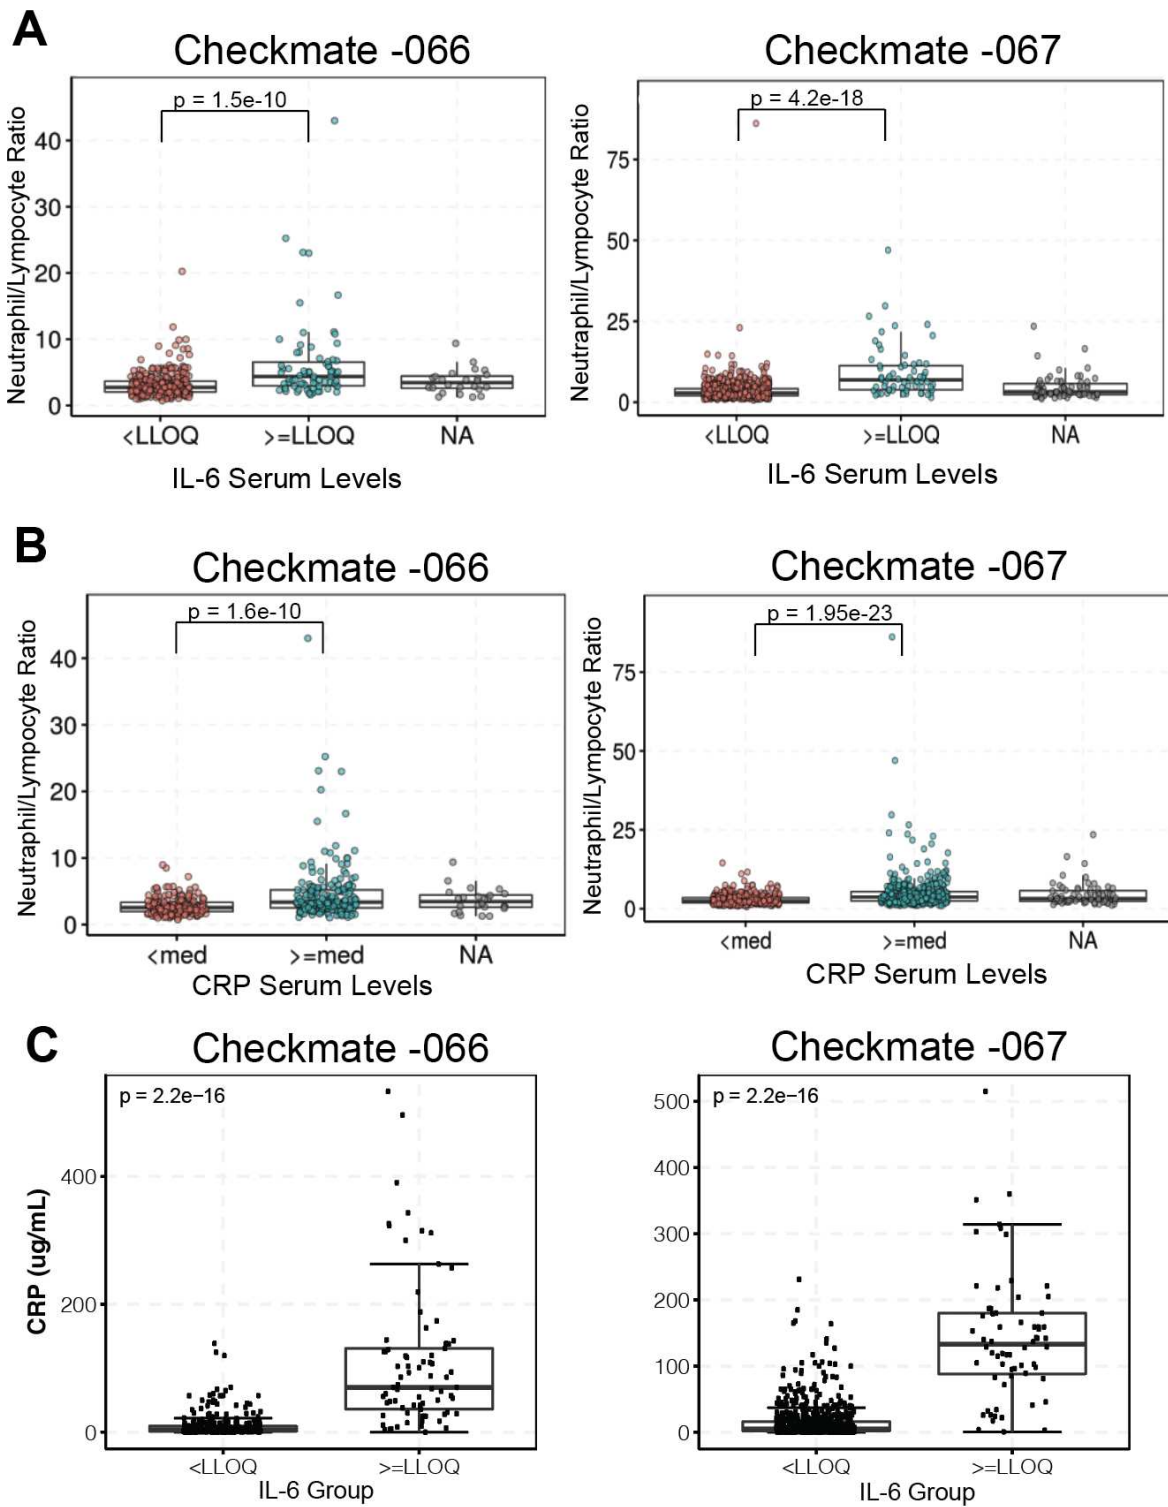

1  
2  
3

1 **Supplemental Figure 2: Comparisons of IL-6, CRP and N/L ratios. (A)** The N/L ratio was  
2 compared between patients with less than the LLOQ for IL-6 and those with greater than the  
3 LLOQ for IL-6. **(B)** The N/L ratio was likewise compared between patients with the less than  
4 the median value of CRP and those with greater than the median value for CRP. **(C)** CRP  
5 levels were compared between patients with less than the LLOQ for IL-6 and those with  
6 greater than the LLOQ for IL-6.  
7
